# Supplementary material for: Synthesis of chiral organotin hydrides containing menthyl and oxazoline substituents†
Source: Royal Society of Chemistry journal article supplement (doi:10.1039/b004259p), 2000-01-01
Supplement: b004259p.doc [file b004259p.doc]

**Supplementary Material**

**Synthesis of Chiral Organotin Hydrides Containing Menthyl and Oxazoline Substituents**

Dainis Dakternieks* and Kerri Dunn

*Centre for Chiral and Molecular Technologies, Deakin University, Geelong, Victoria, Australia 3217*

Carl H. Schiesser

*School of Chemistry, The University of Melbourne, Victoria, Australia 3010*

Edward R.T. Tiekink

*Department of Chemistry, The University of Adelaide, South Australia, Australia 5005*

A series of chiral non-racemic triorganotin halides and triorganotin hydrides containing one or two (1*R*, 2*S*, 5*R*)-menthyl (Men) substituents as well as the 2-(4,4-dimethyl-2-oxazoline)-5-(methyl)phenyl ligand (L) or the chiral 2-(4-isopropyl-2-oxazoline)-5-(methyl)phenyl ligand (L*) have been synthesised and characterized. Each of compounds MenPhLSnCl (**3**) and MenPhLSnH (**4**) has a stereogenic tin centre and were isolated in diastereomeric ratios of 70:30 and 50:50, respectively. Compounds MenPhL*SnCl (**7**) and MenPhL*SnH (**8**) were synthesised in diastereomeric ratios of 50:50 and 66:34, respectively. Single crystal X-ray analysis of Men2LSnCl (**1**) and MenPhLSnCl (**3**) reveals a tendency towards penta-coordination at the tin centre as a result of NSn interactions. AM1 calculations provide good qualitative predictability of the molecular geometries observed in the solid state as well as the diastereomeric ratios observed in solution.

**Compound (*R*sn)-3**

AM1 calculated Heat of Formation for (*R*Sn)-**3** = -8.15374 kJ mol-1

Optimized AM1 Z-matrix for (*R*Sn)-3

| Atom No.  (I) | Chemical Symbol | Bond Length  (Angstroms)  NA:I | Bond Angle (Degrees)  NB:NA:I | Twist Angle  (Degrees)  NC:NB:NA:I | NA | NB | NC |
| --- | --- | --- | --- | --- | --- | --- | --- |
| 1 | C |  |  |  |  |  |  |
| 2 | C | 1.39039 |  |  | 1 |  |  |
| 3 | C | 1.40240 | 119.94408 |  | 2 | 1 |  |
| 4 | C | 1.40455 | 119.86027 | -2.05172 | 3 | 2 | 1 |
| 5 | C | 1.48037 | 119.57489 | 179.01921 | 3 | 2 | 1 |
| 6 | C | 1.38712 | 120.35944 | 0.22677 | 4 | 3 | 2 |
| 7 | C | 1.40232 | 119.88127 | 2.31434 | 1 | 2 | 3 |
| 8 | Sn | 2.1730 | 121.69401 | -175.79786 | 6 | 4 | 3 |
| 9 | C | 1.46175 | 122.49709 | -178.98000 | 7 | 1 | 2 |
| 10 | O | 1.40154 | 119.48562 | -14.34595 | 9 | 7 | 1 |
| 11 | N | 1.31192 | 125.13784 | 165.08485 | 9 | 7 | 1 |
| 12 | C | 1.47801 | 109.14016 | -176.14234 | 11 | 9 | 7 |
| 13 | C | 1.45342 | 106.58530 | -178.79445 | 10 | 9 | 7 |
| 14 | C | 1.53005 | 110.89812 | 110.89686 | 12 | 11 | 9 |
| 15 | C | 1.52429 | 112.93636 | -127.05255 | 12 | 11 | 9 |
| 16 | C | 2.22002 | 112.09017 | 112.08583 | 8 | 6 | 4 |
| 17 | C | 2.12861 | 115.57236 | -109.77746 | 8 | 6 | 4 |
| 18 | C | 1.39185 | 119.41539 | -157.74632 | 17 | 8 | 6 |
| 19 | C | 1.39141 | 119.97476 | 18.65579 | 17 | 8 | 6 |
| 20 | C | 1.39843 | 119.65472 | -176.80336 | 19 | 17 | 8 |
| 21 | C | 1.39393 | 120.16217 | 0.08331 | 20 | 19 | 17 |
| 22 | C | 1.39460 | 119.83077 | 0.08382 | 21 | 20 | 19 |
| 23 | C | 1.51376 | 114.61860 | -125.69315 | 16 | 8 | 6 |
| 24 | C | 1.50668 | 105.67114 | -1.59635 | 16 | 8 | 6 |
| 25 | C | 1.52665 | 111.39923 | 178.08439 | 24 | 16 | 8 |
| 26 | C | 1.51985 | 109.18386 | 57.98311 | 25 | 24 | 16 |
| 27 | C | 1.51164 | 110.86812 | -179.44829 | 25 | 24 | 16 |
| 28 | C | 1.51323 | 109.80138 | -58.54021 | 26 | 25 | 24 |
| 29 | C | 1.53103 | 113.66192 | -61.56177 | 23 | 16 | 8 |
| 30 | C | 1.51453 | 114.02354 | -74.70998 | 29 | 23 | 16 |
| 31 | C | 1.51716 | 110.23424 | 161.5524 | 29 | 23 | 16 |
| 32 | H | 1.10134 | 120.80743 | -178.57336 | 1 | 2 | 3 |
| 33 | H | 1.09935 | 120.16521 | 178.90554 | 2 | 1 | 3 |
| 34 | H | 1.10358 | 119.35926 | -179.28200 | 4 | 3 | 2 |
| 35 | H | 1.11716 | 107.01391 | 114.45772 | 13 | 10 | 9 |
| 36 | H | 1.11559 | 106.62551 | -125.96899 | 13 | 10 | 9 |
| 37 | H | 1.11707 | 110.96205 | -57.56470 | 14 | 12 | 11 |
| 38 | H | 1.11641 | 110.24283 | 62.91133 | 14 | 12 | 11 |
| 39 | H | 1.11517 | 109.11563 | -177.29436 | 14 | 12 | 11 |
| 40 | H | 1.11777 | 110.76142 | 61.61491 | 15 | 12 | 11 |
| 41 | H | 1.11577 | 109.24558 | -178.87716 | 15 | 12 | 11 |
| 42 | H | 1.11821 | 110.11381 | -59.80775 | 15 | 12 | 11 |
| 43 | H | 1.11898 | 111.43533 | 171.15697 | 5 | 3 | 2 |
| 44 | H | 1.11992 | 110.26377 | 51.05496 | 5 | 3 | 2 |
| 45 | H | 1.12045 | 110.19344 | -68.02713 | 5 | 3 | 2 |
| 46 | Cl | 2.31181 | 99.92612 | -0.94272 | 8 | 6 | 4 |
| 47 | H | 1.10100 | 120.70638 | -3.08129 | 18 | 17 | 8 |
| 48 | H | 1.10175 | 121.20394 | 3.21717 | 19 | 17 | 8 |
| 49 | H | 1.10054 | 119.77626 | -179.86862 | 20 | 19 | 17 |
| 50 | H | 1.10069 | 120.08030 | -179.56188 | 21 | 20 | 19 |
| 51 | H | 1.10151 | 120.11177 | -179.68257 | 22 | 21 | 20 |
| 52 | H | 1.13025 | 107.91813 | 57.27292 | 23 | 16 | 8 |
| 53 | H | 1.11464 | 99.31413 | 115.08312 | 16 | 8 | 6 |
| 54 | H | 1.12297 | 110.77574 | 57.40778 | 24 | 16 | 8 |
| 55 | H | 1.12367 | 110.21689 | -61.57785 | 24 | 16 | 8 |
| 56 | H | 1.12693 | 108.48091 | -60.28425 | 25 | 24 | 16 |
| 57 | H | 1.12050 | 109.83843 | -179.36458 | 26 | 25 | 24 |
| 58 | H | 1.12115 | 109.67384 | 62.49781 | 26 | 25 | 24 |
| 59 | H | 1.12225 | 108.90887 | -63.03487 | 28 | 26 | 25 |
| 60 | H | 1.12066 | 109.44955 | 179.52085 | 28 | 26 | 25 |
| 61 | H | 1.12975 | 107.53027 | 44.74419 | 29 | 23 | 16 |
| 62 | H | 1.11592 | 110.53286 | 60.66431 | 27 | 25 | 24 |
| 63 | H | 1.11673 | 110.16869 | -179.33917 | 27 | 25 | 24 |
| 64 | H | 1.11619 | 110.69524 | -59.42448 | 27 | 25 | 24 |
| 65 | H | 1.11818 | 111.08487 | 51.76631 | 30 | 29 | 23 |
| 66 | H | 1.11822 | 111.08211 | -69.08531 | 30 | 29 | 23 |
| 67 | H | 1.11557 | 109.61488 | 171.77338 | 30 | 29 | 23 |
| 68 | H | 1.11678 | 110.44960 | -56.60581 | 31 | 29 | 23 |
| 69 | H | 1.11641 | 111.06897 | 64.03413 | 31 | 29 | 23 |
| 70 | H | 1.11714 | 109.83856 | -176.20464 | 31 | 29 | 23 |

**Compound (*S*Sn)-3**

AM1 calculated Heat of Formation for (*S*Sn)-**3** = -8.00832 kJ mol-1

Optimized AM1 Z-matrix for (*S*Sn)-3

| Atom No.  (I) | Chemical Symbol | Bond Length  (Angstroms)  NA:I | Bond Angle (Degrees)  NB:NA:I | Twist Angle  (Degrees)  NC:NB:NA:I | NA | NB | NC |
| --- | --- | --- | --- | --- | --- | --- | --- |
| 1 | C |  |  |  |  |  |  |
| 2 | C | 1.51086 |  |  | 1 |  |  |
| 3 | Sn | 2.19909 | 116.15274 |  | 2 | 1 |  |
| 4 | C | 2.12971 | 111.77865 | 63.38320 | 3 | 2 | 1 |
| 5 | C | 2.12254 | 119.92409 | -159.79085 | 3 | 2 | 1 |
| 6 | C | 1.39130 | 120.18099 | 41.79176 | 5 | 3 | 2 |
| 7 | C | 1.39162 | 119.34074 | -136.33206 | 5 | 3 | 2 |
| 8 | C | 1.39775 | 119.77877 | 177.18627 | 7 | 5 | 3 |
| 9 | C | 1.39432 | 120.05258 | 0.27837 | 8 | 7 | 5 |
| 10 | C | 1.39401 | 119.87925 | 0.57998 | 9 | 8 | 7 |
| 11 | C | 1.52666 | 109.50559 | 177.78985 | 1 | 2 | 3 |
| 12 | C | 1.53050 | 113.95614 | -56.78605 | 1 | 2 | 3 |
| 13 | C | 1.50561 | 112.65086 | -122.16510 | 2 | 1 | 3 |
| 14 | C | 1.52738 | 110.23530 | -56.99015 | 13 | 2 | 1 |
| 15 | C | 1.51167 | 111.35857 | -55.732221 | 11 | 1 | 2 |
| 16 | C | 1.50906 | 110.72759 | 179.76031 | 14 | 13 | 2 |
| 17 | C | 1.51314 | 113.97061 | -64.37972 | 12 | 1 | 2 |
| 18 | C | 1.51803 | 109.94987 | 171.729681 | 12 | 1 | 2 |
| 19 | C | 138.513 | 121.49806 | -109.83545 | 4 | 3 | 2 |
| 20 | C | 1.40340 | 118.33113 | 66.13642 | 4 | 3 | 2 |
| 21 | C | 1.39841 | 120.21496 | -173.08268 | 20 | 4 | 3 |
| 22 | C | 1.45977 | 117.93423 | 6.70463 | 20 | 4 | 3 |
| 23 | O | 1.40145 | 118.88523 | 174.40282 | 22 | 20 | 4 |
| 24 | N | 1.31073 | 125.76788 | -4.95742 | 22 | 20 | 4 |
| 25 | C | 1.47813 | 109.14287 | -177.55979 | 24 | 22 | 20 |
| 26 | C | 1.45159 | 106.71149 | -178.23944 | 23 | 22 | 20 |
| 27 | C | 1.53098 | 111.80703 | 112.07912 | 25 | 24 | 22 |
| 28 | C | 1.52596 | 112.58679 | -126.07997 | 25 | 24 | 22 |
| 29 | C | 1.39380 | 119.45764 | -2.50525 | 21 | 20 | 4 |
| 30 | C | 1.39983 | 120.50928 | 0.28768 | 29 | 21 | 20 |
| 31 | C | 1.48020 | 121.01505 | -178.43255 | 30 | 29 | 21 |
| 32 | H | 1.10127 | 119.85391 | 178.00228 | 21 | 20 | 4 |
| 33 | H | 1.10080 | 119.58690 | 179.30536 | 29 | 21 | 20 |
| 34 | H | 1.10312 | 120.38496 | -5.20896 | 19 | 4 | 3 |
| 35 | H | 1.11505 | 107.11823 | 115.32863 | 26 | 23 | 22 |
| 36 | H | 1.11444 | 106.81899 | -124.56678 | 26 | 23 | 22 |
| 37 | H | 1.11602 | 111.11715 | -57.33823 | 27 | 25 | 24 |
| 38 | H | 1.11724 | 110.37873 | 63.24660 | 27 | 25 | 24 |
| 39 | H | 1.11539 | 108.80863 | -177.32351 | 27 | 25 | 24 |
| 40 | H | 1.11538 | 111.31785 | 57.29897 | 28 | 25 | 24 |
| 41 | H | 1.11461 | 108.93138 | 177.65525 | 28 | 25 | 24 |
| 42 | H | 1.11891 | 110.13241 | -63.03696 | 28 | 25 | 24 |
| 43 | H | 1.11910 | 110.32848 | -121.19518 | 31 | 30 | 29 |
| 44 | H | 1.11917 | 109.96375 | 119.81921 | 31 | 30 | 29 |
| 45 | H | 1.11722 | 111.47252 | -0.63900 | 31 | 30 | 29 |
| 46 | Cl | 2.31220 | 105.33827 | -45.96410 | 3 | 2 | 1 |
| 47 | H | 1.10133 | 121.04957 | 3.06982 | 6 | 5 | 3 |
| 48 | H | 1.0031 | 120.79672 | -2.83806 | 7 | 5 | 3 |
| 49 | H | 1.09964 | 119.59364 | 179.79706 | 8 | 7 | 5 |
| 50 | H | 1.10008 | 120.13702 | -179.95668 | 9 | 8 | 7 |
| 51 | H | 1.09946 | 120.06061 | 179.05507 | 10 | 9 | 8 |
| 52 | H | 1.13151 | 107.80530 | 61.39893 | 1 | 2 | 3 |
| 53 | H | 1.11578 | 109.78221 | 113.86878 | 2 | 1 | 3 |
| 54 | H | 1.12372 | 110.18747 | -177.05071 | 13 | 2 | 1 |
| 55 | H | 1.12273 | 110.80264 | 63.64118 | 13 | 2 | 1 |
| 56 | H | 1.12789 | 108.26373 | -61.13044 | 14 | 13 | 2 |
| 57 | H | 1.12026 | 109.51877 | 178.98708 | 15 | 11 | 1 |
| 58 | H | 1.12151 | 109.71799 | -62.78467 | 15 | 11 | 1 |
| 59 | H | 1.11941 | 109.93473 | 65.97093 | 11 | 1 | 2 |
| 60 | H | 1.12126 | 109.47414 | -176.21015 | 11 | 1 | 2 |
| 61 | H | 1.13150 | 107.44042 | 55.05292 | 12 | 1 | 2 |
| 62 | H | 1.11627 | 110.41804 | 56.60503 | 16 | 14 | 13 |
| 63 | H | 1.11581 | 110.28181 | 176.72555 | 16 | 14 | 13 |
| 64 | H | 1.11516 | 110.47927 | -63.50983 | 16 | 14 | 13 |
| 65 | H | 1.11543 | 110.74748 | 57.22394 | 17 | 12 | 1 |
| 66 | H | 1.11631 | 111.30379 | -63.61537 | 17 | 12 | 1 |
| 67 | H | 1.11630 | 109.94347 | 176.28829 | 17 | 12 | 1 |
| 68 | H | 1.11732 | 110.51886 | -49.54106 | 18 | 12 | 1 |
| 69 | H | 1.11684 | 111.02384 | 71.14234 | 18 | 12 | 1 |
| 70 | H | 1.11679 | 109.96539 | -169.30561 | 18 | 12 | 1 |

**Compound (*R*Sn)-7**

AM1 calculated Heat of Formation for (*R*Sn)-**7** = -16.43488 kJ mol-1

Optimized AM1 Z-matrix for (*R*Sn)-7

| Atom No.  (I) | Chemical Symbol | Bond Length  (Angstroms)  NA:I | Bond Angle (Degrees)  NB:NA:I | Twist Angle  (Degrees)  NC:NB:NA:I | NA | NB | NC |
| --- | --- | --- | --- | --- | --- | --- | --- |
| 1 | C |  |  |  |  |  |  |
| 2 | C | 1.39280 |  |  | 1 |  |  |
| 3 | C | 1.40171 | 119.66018 |  | 2 | 1 |  |
| 4 | C | 1.40426 | 119.70710 | -4.35594 | 3 | 2 | 1 |
| 5 | C | 1.48121 | 122.26465 | 177.65648 | 3 | 2 | 1 |
| 6 | C | 1.38559 | 120.64222 | 1.46863 | 4 | 3 | 2 |
| 7 | C | 1.40264 | 119.78166 | 1.94065 | 6 | 4 | 3 |
| 8 | Sn | 2.13820 | 118.60605 | -176.39392 | 6 | 4 | 3 |
| 9 | C | 1.46551 | 117.77418 | 175.52275 | 7 | 6 | 4 |
| 10 | C | 2.20968 | 115.75005 | 116.33264 | 8 | 6 | 4 |
| 11 | C | 2.10957 | 113.82969 | -105.91400 | 8 | 6 | 4 |
| 12 | O | 1.40347 | 117.86158 | 169.63138 | 9 | 7 | 6 |
| 13 | N | 1.31209 | 126.94623 | -12.09145 | 9 | 7 | 6 |
| 14 | C | 1.51435 | 115.10320 | -130.68242 | 10 | 8 | 6 |
| 15 | C | 1.50350 | 103.57029 | -7.15763 | 10 | 8 | 6 |
| 16 | C | 1.39126 | 118.76677 | -168.44544 | 11 | 8 | 6 |
| 17 | C | 1.39038 | 120.61603 | 10.43691 | 11 | 8 | 6 |
| 18 | C | 1.45217 | 106.63972 | -179.86162 | 12 | 9 | 7 |
| 19 | C | 1.47041 | 108.96573 | -175.16847 | 13 | 9 | 7 |
| 20 | C | 1.53393 | 114.71452 | -129.30215 | 19 | 13 | 9 |
| 21 | C | 1.51585 | 111.27671 | 172.85687 | 20 | 19 | 13 |
| 22 | C | 1.51517 | 112.28670 | -65.64260 | 20 | 19 | 13 |
| 23 | C | 1.53079 | 109.41700 | 171.94436 | 14 | 10 | 8 |
| 24 | C | 1.53162 | 113.95156 | -63.64017 | 14 | 10 | 8 |
| 25 | C | 1.52540 | 111.39821 | 179.13833 | 15 | 10 | 8 |
| 26 | C | 1.39637 | 119.88382 | 179.08288 | 16 | 11 | 8 |
| 27 | C | 1.39903 | 119.43840 | -178.67466 | 17 | 11 | 8 |
| 28 | C | 1.39438 | 119.90029 | -0.39080 | 26 | 16 | 11 |
| 29 | C | 1.51236 | 111.87569 | -55.33442 | 23 | 14 | 10 |
| 30 | C | 1.51400 | 113.85960 | -75.97598 | 24 | 14 | 10 |
| 31 | C | 1.51796 | 110.62794 | 160.27081 | 24 | 14 | 10 |
| 32 | C | 1.51111 | 110.30134 | -179.84281 | 25 | 15 | 10 |
| 33 | H | 1.10125 | 120.59121 | -177.31050 | 1 | 2 | 3 |
| 34 | H | 1.09985 | 120.10339 | 177.85692 | 2 | 1 | 3 |
| 35 | H | 1.10420 | 118.66504 | -177.83406 | 4 | 3 | 2 |
| 36 | H | 1.11747 | 111.90204 | -0.86314 | 5 | 3 | 2 |
| 37 | H | 1.12071 | 109.94209 | -121.70683 | 5 | 3 | 2 |
| 38 | H | 1.12014 | 109.82768 | 119.89590 | 5 | 3 | 2 |
| 39 | Cl | 2.31437 | 100.66535 | 3.03893 | 8 | 6 | 4 |
| 40 | H | 1.11679 | 100.12124 | 109.17317 | 10 | 8 | 6 |
| 41 | H | 1.11576 | 106.86440 | -126.12854 | 18 | 12 | 9 |
| 42 | H | 1.11983 | 106.36546 | 115.44123 | 18 | 12 | 9 |
| 43 | H | 1.12813 | 107.00159 | 109.73091 | 19 | 13 | 9 |
| 44 | H | 1.13166 | 108.29548 | 54.25969 | 20 | 19 | 13 |
| 45 | H | 1.11557 | 111.28643 | -60.97097 | 21 | 20 | 19 |
| 46 | H | 1.11758 | 109.49033 | 179.60834 | 21 | 20 | 19 |
| 47 | H | 1.11659 | 111.09021 | 60.12902 | 21 | 20 | 19 |
| 48 | H | 1.11778 | 111.76402 | 44.24248 | 22 | 20 | 19 |
| 49 | H | 1.11985 | 109.65464 | 164.54210 | 22 | 20 | 19 |
| 50 | H | 1.11666 | 110.70826 | -76.15236 | 22 | 20 | 19 |
| 51 | H | 1.13020 | 107.88233 | 55.23745 | 14 | 10 | 8 |
| 52 | H | 1.12301 | 110.63496 | 58.31395 | 15 | 10 | 8 |
| 53 | H | 1.12285 | 110.09049 | -60.43096 | 15 | 10 | 8 |
| 54 | H | 1.10205 | 121.50548 | -0.11821 | 16 | 11 | 8 |
| 55 | H | 1.10066 | 120.93996 | 1.11275 | 17 | 11 | 8 |
| 56 | H | 1.09889 | 119.91940 | 179.60013 | 26 | 16 | 11 |
| 57 | H | 1.09946 | 119.65006 | -179.74428 | 27 | 17 | 11 |
| 58 | H | 1.09790 | 119.84199 | -179.92673 | 28 | 26 | 16 |
| 59 | H | 1.12058 | 108.90263 | -176.84939 | 23 | 14 | 10 |
| 60 | H | 1.12199 | 109.67949 | 65.81637 | 23 | 14 | 10 |
| 61 | H | 1.12899 | 107.18245 | 44.24523 | 24 | 14 | 10 |
| 62 | H | 1.12683 | 108.58341 | -60.92094 | 25 | 15 | 10 |
| 63 | H | 1.11978 | 109.80773 | -179.74249 | 29 | 23 | 14 |
| 64 | H | 1.12274 | 110.27398 | -61.79857 | 29 | 23 | 14 |
| 65 | H | 1.11676 | 110.27032 | 61.68889 | 32 | 25 | 15 |
| 66 | H | 1.11571 | 110.31568 | -178.28571 | 32 | 25 | 15 |
| 67 | H | 1.11665 | 110.49262 | -58.44538 | 32 | 25 | 15 |
| 68 | H | 1.11637 | 111.23502 | 48.98347 | 30 | 24 | 14 |
| 69 | H | 1.11655 | 110.76516 | -71.94525 | 30 | 24 | 14 |
| 70 | H | 1.11787 | 109.82267 | 168.85279 | 30 | 24 | 14 |
| 71 | H | 1.11661 | 110.35039 | -58.63862 | 31 | 24 | 14 |
| 72 | H | 1.11635 | 111.08604 | 61.92288 | 31 | 24 | 14 |
| 73 | H | 1.11661 | 109.86238 | -178.21259 | 31 | 24 | 14 |

**Compound (*S*Sn)-7**

AM1 calculated Heat of Formation for (*S*Sn)-**7** = -15.77173 kJ mol-1

Optimized AM1 Z-matrix for (*S*Sn)-7

| Atom No.  (I) | Chemical Symbol | Bond Length  (Angstroms)  NA:I | Bond Angle (Degrees)  NB:NA:I | Twist Angle  (Degrees)  NC:NB:NA:I | NA | NB | NC |
| --- | --- | --- | --- | --- | --- | --- | --- |
| 1 | C |  |  |  |  |  |  |
| 2 | C | 1.52202 |  |  | 1 |  |  |
| 3 | Sn | 2.21110 | 118.49002 |  | 2 | 1 |  |
| 4 | C | 2.11814 | 111.40618 | 65.10706 | 3 | 2 | 1 |
| 5 | C | 2.12956 | 123.76797 | -159.20819 | 3 | 2 | 1 |
| 6 | C | 1.38756 | 118.87104 | -106.73440 | 4 | 3 | 2 |
| 7 | C | 1.39817 | 120.60408 | 70.18182 | 4 | 3 | 2 |
| 8 | C | 1.39002 | 119.12659 | 38.02125 | 5 | 3 | 2 |
| 9 | C | 1.39289 | 120.45018 | -142.15325 | 5 | 3 | 2 |
| 10 | C | 1.39792 | 119.86475 | -178.83914 | 8 | 5 | 3 |
| 11 | C | 1.39668 | 119.64936 | 178.73124 | 9 | 5 | 3 |
| 12 | C | 1.39403 | 120.00743 | -0.39857 | 10 | 8 | 5 |
| 13 | C | 1.40160 | 120.23267 | 176.86544 | 6 | 4 | 3 |
| 14 | C | 1.40249 | 119.64313 | -176.27218 | 7 | 4 | 3 |
| 15 | C | 1.46100 | 119.66087 | 4.33577 | 7 | 4 | 3 |
| 16 | C | 1.39292 | 119.80794 | -0.97664 | 14 | 7 | 4 |
| 17 | O | 1.41108 | 116.32368 | 176.53988 | 15 | 7 | 4 |
| 18 | N | 1.30954 | 128.26717 | -2.24845 | 15 | 7 | 4 |
| 19 | C | 1.44857 | 106.65260 | -179.34153 | 17 | 15 | 7 |
| 20 | C | 1.46828 | 108.58177 | 178.54514 | 18 | 15 | 7 |
| 21 | C | 1.53546 | 114.72342 | -123.70669 | 20 | 18 | 15 |
| 22 | C | 1.51348 | 113.51779 | 69.79562 | 21 | 20 | 18 |
| 23 | C | 1.51486 | 108.78132 | -166.37806 | 21 | 20 | 18 |
| 24 | C | 1.47994 | 120.29309 | -179.39876 | 13 | 6 | 4 |
| 25 | C | 1.53088 | 107.70937 | 178.21955 | 1 | 2 | 3 |
| 26 | C | 1.52837 | 113.61486 | -57.90647 | 1 | 2 | 3 |
| 27 | C | 1.50365 | 112.97128 | -121.76854 | 2 | 1 | 3 |
| 28 | C | 1.51402 | 112.12593 | -56.05600 | 25 | 1 | 2 |
| 29 | C | 1.51456 | 113.64783 | -67.91741 | 26 | 1 | 2 |
| 30 | C | 1.51748 | 110.36071 | 168.35152 | 26 | 1 | 2 |
| 31 | C | 1.52029 | 110.80171 | 58.36485 | 28 | 25 | 1 |
| 32 | C | 1.51235 | 111.84501 | -179.70083 | 31 | 28 | 25 |
| 33 | H | 1.12853 | 108.32673 | 61.74254 | 1 | 2 | 3 |
| 34 | H | 1.11461 | 110.07682 | 112.54754 | 2 | 1 | 3 |
| 35 | Cl | 2.31262 | 104.37887 | -44.59822 | 3 | 2 | 1 |
| 36 | H | 1.10404 | 120.90163 | 1.31517 | 8 | 5 | 3 |
| 37 | H | 1.10111 | 120.94344 | -0.78892 | 9 | 5 | 3 |
| 38 | H | 1.09813 | 120.19568 | -178.81715 | 11 | 9 | 5 |
| 39 | H | 1.10081 | 120.02451 | 179.64605 | 12 | 10 | 8 |
| 40 | H | 1.10011 | 119.77209 | 179.75264 | 10 | 8 | 5 |
| 41 | H | 1.12115 | 108.74402 | -177.05686 | 25 | 1 | 2 |
| 42 | H | 1.121138 | 109.46290 | 65.65495 | 25 | 1 | 2 |
| 43 | H | 1.12966 | 107.29962 | 51.28020 | 26 | 1 | 2 |
| 44 | H | 1.12455 | 110.23459 | -178.36768 | 27 | 2 | 1 |
| 45 | H | 1.12256 | 110.72967 | 62.44426 | 27 | 2 | 1 |
| 46 | H | 1.12740 | 108.36767 | 60.83536 | 31 | 28 | 25 |
| 47 | H | 1.12171 | 109.73468 | -62.70195 | 28 | 25 | 1 |
| 48 | H | 1.12129 | 109.50666 | 179.40354 | 28 | 25 | 1 |
| 49 | H | 1.11822 | 110.39026 | 178.46574 | 32 | 31 | 28 |
| 50 | H | 1.11619 | 110.40112 | -61.62891 | 32 | 31 | 28 |
| 51 | H | 1.11880 | 110.72359 | 58.45243 | 32 | 31 | 28 |
| 52 | H | 1.11599 | 111.16734 | 50.90084 | 29 | 26 | 1 |
| 53 | H | 1.11681 | 110.99744 | -69.93860 | 29 | 26 | 1 |
| 54 | H | 1.11682 | 109.75973 | 170.64891 | 29 | 26 | 1 |
| 55 | H | 1.11573 | 110.61642 | -50.59179 | 30 | 26 | 1 |
| 56 | H | 1.11790 | 110.96480 | 70.02591 | 30 | 26 | 1 |
| 57 | H | 1.11609 | 109.82666 | -170.49071 | 30 | 26 | 1 |
| 58 | H | 1.10376 | 120.41118 | -3.17376 | 6 | 4 | 3 |
| 59 | H | 1.10076 | 119.53463 | 179.62318 | 14 | 7 | 4 |
| 60 | H | 1.12916 | 107.16995 | 116.97038 | 20 | 18 | 15 |
| 61 | H | 1.11328 | 106.75173 | -119.03152 | 19 | 17 | 15 |
| 62 | H | 1.11419 | 107.04977 | 121.58714 | 19 | 17 | 15 |
| 63 | H | 1.12981 | 107.30437 | -49.35071 | 21 | 20 | 18 |
| 64 | H | 1.10066 | 119.93648 | -179.39097 | 16 | 14 | 7 |
| 65 | H | 1.11851 | 111.30338 | -5.51689 | 24 | 13 | 6 |
| 66 | H | 1.11795 | 110.44861 | -125.98902 | 24 | 13 | 6 |
| 67 | H | 1.11946 | 110.06427 | 114.56453 | 24 | 13 | 6 |
| 68 | H | 1.11809 | 110.87006 | -38.75887 | 22 | 21 | 20 |
| 69 | H | 1.11708 | 111.59098 | 82.77300 | 22 | 21 | 20 |
| 70 | H | 1.11888 | 109.64030 | -157.46236 | 22 | 21 | 20 |
| 71 | H | 1.11453 | 110.46171 | 55.00923 | 23 | 21 | 20 |
| 72 | H | 1.11743 | 110.82653 | -65.37928 | 23 | 21 | 20 |
| 73 | H | 1.11473 | 109.77009 | 174.72747 | 23 | 21 | 20 |
